# Supplementary material for: Speed of sound measurements conducted at high pressures on aqueous alcohol and aqueous diol systems at T= 298.15 K
Source: Royal Society of Chemistry journal article supplement (doi:10.1039/b503594e), 2005-01-01
Supplement: b503594e.pdf [file b503594e.pdf]

**Table S1.** Measured speeds of sound,  $u$  ( $\text{m s}^{-1}$ ), for selected aqueous alcohol and aqueous diol systems at fixed concentrations,  $p = (0.1, 20.0, 40.0, 60.0, 80.0, 120.0)$  MPa, and  $T = 298.15$  K

| 2-propanol |                       |                       |                       |                       |                       |                       |
|------------|-----------------------|-----------------------|-----------------------|-----------------------|-----------------------|-----------------------|
| $p$        | $m=0.04760$           | $m=0.07518$           | $m=0.14367$           | $m=0.20718$           | $m=0.29132$           | $m=0.51970$           |
| /MPa       | /mol kg <sup>-1</sup> |
| 0.1        | 1499.14               | 1500.57               | 1504.11               | 1507.35               | 1511.62               | 1523.06               |
| 20.0       | 1532.63               | 1533.90               | 1537.28               | 1540.37               | 1544.40               | 1555.00               |
| 40.0       | 1565.98               | 1567.20               | 1570.21               | 1573.11               | 1581.71               | 1586.76               |
| 60.0       | 1599.20               | 1600.38               | 1603.14               | 1605.76               | 1609.27               | 1618.70               |
| 80.0       | 1632.40               | 1633.55               | 1635.94               | 1638.29               | 1641.43               | 1650.05               |
| 120.0      | 1697.89               | 1698.76               | 1700.81               | 1702.73               | 1705.32               | 1712.95               |
| 2-butanol  |                       |                       |                       |                       |                       |                       |
|            | $m=0.06700$           | $m=0.14261$           | $m=0.22305$           | $m=0.50121$           |                       |                       |
|            | /mol kg <sup>-1</sup> | /mol kg <sup>-1</sup> | /mol kg <sup>-1</sup> | /mol kg <sup>-1</sup> |                       |                       |
| 0.1        | 1501.36               | 1506.62               | 1512.16               | 1530.84               |                       |                       |
| 20.0       | 1534.51               | 1539.24               | 1544.25               | 1561.42               |                       |                       |
| 40.0       | 1567.76               | 1572.22               | 1576.94               | 1593.12               |                       |                       |
| 60.0       | 1600.99               | 1605.13               | 1609.73               | 1625.09               |                       |                       |
| 80.0       | 1633.99               | 1638.00               | 1642.29               | 1656.82               |                       |                       |
| 120.0      | 1699.62               | 1702.98               | 1706.68               | 1719.78               |                       |                       |
| 2-pentanol |                       |                       |                       |                       |                       |                       |
|            | $m=0.06386$           | $m=0.08559$           | $m=0.11549$           | $m=0.27075$           | $m=0.49376$           |                       |
|            | /mol kg <sup>-1</sup> |                       |
| 0.1        | 1502.06               | 1503.88               | 1506.33               | 1518.85               | 1535.86               |                       |
| 20.0       | 1535.13               | 1536.80               | 1539.01               | 1550.07               | 1564.64               |                       |
| 40.0       | 1568.36               | 1569.94               | 1572.02               | 1582.44               | 1597.26               |                       |
| 60.0       | 1601.60               | 1603.10               | 1605.10               | 1615.06               | 1629.39               |                       |
| 80.0       | 1634.66               | 1636.04               | 1637.87               | 1647.10               | 1659.59               |                       |
| 120.0      | 1699.87               | 1701.37               | 1703.04               | 1711.28               | 1722.57               |                       |
| 2-hexanol  |                       |                       |                       |                       |                       |                       |
|            | $m=0.03075$           | $m=0.04110$           | $m=0.04868$           | $m=0.05999$           | $m=0.08201$           |                       |
|            | /mol kg <sup>-1</sup> |                       |
| 0.1        | 1499.83               | 1500.90               | 1501.64               | 1502.80               | 1505.03               |                       |
| 20.0       | 1532.86               | 1533.76               | 1534.41               | 1535.37               | 1537.13               |                       |
| 40.0       | 1566.22               | 1567.03               | 1567.63               | 1568.49               | 1570.21               |                       |
| 60.0       | 1599.54               | 1600.28               | 1600.79               | 1601.64               | 1603.21               |                       |
| 80.0       | 1632.75               | 1633.49               | 1633.96               | 1634.72               | 1636.18               |                       |
| 120.0      | 1698.42               | 1699.05               | 1699.48               | 1700.18               | 1701.56               |                       |

**Table S1 (cont.)**

| 1,4-butanediol  |                       |                       |                       |                       |
|-----------------|-----------------------|-----------------------|-----------------------|-----------------------|
| <i>p</i>        | <i>m</i> =0.25266     | <i>m</i> =0.26786     | <i>m</i> =0.29529     | <i>m</i> =0.48784     |
| /MPa            | /mol kg <sup>-1</sup> | /mol kg <sup>-1</sup> | /mol kg <sup>-1</sup> | /mol kg <sup>-1</sup> |
| 0.1             | 1508.92               | 1509.64               | 1510.92               | 1519.93               |
| 20.0            | 1541.64               | 1542.18               | 1543.41               | 1551.74               |
| 40.0            | 1574.82               | 1575.38               | 1576.55               | 1584.56               |
| 60.0            | 1607.83               | 1608.35               | 1609.46               | 1617.10               |
| 80.0            | 1640.29               | 1641.01               | 1641.99               | 1649.22               |
| 120.0           | 1705.11               | 1705.60               | 1706.50               | 1713.12               |
| 1,5-pentanediol |                       |                       |                       |                       |
|                 | <i>m</i> =0.07314     | <i>m</i> =0.14913     | <i>m</i> =0.36620     | <i>m</i> =0.44095     |
|                 | /mol kg <sup>-1</sup> | /mol kg <sup>-1</sup> | /mol kg <sup>-1</sup> | /mol kg <sup>-1</sup> |
| 0.1             | 1501.32               | 1506.06               | 1519.12               | 1523.42               |
| 20.0            | 1534.64               | 1539.13               | 1551.56               | 1555.67               |
| 40.0            | 1568.05               | 1572.43               | 1584.26               | 1588.50               |
| 60.0            | 1601.34               | 1605.53               | 1616.93               | 1621.03               |
| 80.0            | 1634.43               | 1638.32               | 1649.26               | 1653.05               |
| 120.0           | 1699.86               | 1703.25               | 1712.73               | 1716.59               |
| 1,6-hexanediol  |                       |                       |                       |                       |
|                 | <i>m</i> =0.06751     | <i>m</i> =0.09216     | <i>m</i> =0.29736     | <i>m</i> =0.41309     |
|                 | /mol kg <sup>-1</sup> | /mol kg <sup>-1</sup> | /mol kg <sup>-1</sup> | /mol kg <sup>-1</sup> |
| 0.1             | 1502.06               | 1503.88               | 1519.29               | 1527.38               |
| 20.0            | 1535.13               | 1536.80               | 1551.52               | 1559.19               |
| 40.0            | 1568.36               | 1569.94               | 1584.52               | 1592.18               |
| 60.0            | 1601.60               | 1603.10               | 1617.19               | 1624.70               |
| 80.0            | 1634.66               | 1636.04               | 1649.51               | 1656.62               |
| 120.0           | 1699.87               | 1701.37               | 1713.62               | 1720.23               |

**Table S2.** Calculated densities,  $\rho_2$  /( $\text{kg m}^{-3}$ ), for selected aqueous alcohol and aqueous diol systems at fixed concentrations,  $p = (0.1, 20.0, 40.0, 60.0, 80.0, 120.0)$  MPa, and  $T = 298.15$  K

| 2-propanol |                       |                       |                       |                       |                       |                       |
|------------|-----------------------|-----------------------|-----------------------|-----------------------|-----------------------|-----------------------|
| $p$        | $m=0.04760$           | $m=0.07518$           | $m=0.14367$           | $m=0.20718$           | $m=0.29132$           | $m=0.51970$           |
| /MPa       | /mol $\text{kg}^{-1}$ |
| 0.1*       | 996.501               | 996.190               | 995.433               | 994.742               | 993.864               | 991.577               |
| 20.0       | 1005.262              | 1004.936              | 1004.140              | 1003.414              | 1002.481              | 1000.085              |
| 40.0       | 1013.719              | 1013.380              | 1012.550              | 1011.792              | 1010.808              | 1008.318              |
| 60.0       | 1021.845              | 1021.495              | 1020.636              | 1019.851              | 1018.822              | 1016.250              |
| 80.0       | 1029.665              | 1029.304              | 1028.421              | 1027.613              | 1026.543              | 1023.900              |
| 120.0      | 1044.461              | 1044.084              | 1043.164              | 1042.320              | 1041.191              | 1038.424              |
| 2-butanol  |                       |                       |                       |                       |                       |                       |
|            | $m=0.06700$           | $m=0.14261$           | $m=0.22305$           | $m=0.50121$           |                       |                       |
|            | /mol $\text{kg}^{-1}$ | /mol $\text{kg}^{-1}$ | /mol $\text{kg}^{-1}$ | /mol $\text{kg}^{-1}$ |                       |                       |
| 0.1*       | 996.237               | 995.347               | 994.424               | 991.452               |                       |                       |
| 20.0       | 1004.976              | 1004.030              | 1003.051              | 999.893               |                       |                       |
| 40.0       | 1013.414              | 1012.420              | 1011.392              | 1008.072              |                       |                       |
| 60.0       | 1021.524              | 1020.489              | 1019.417              | 1015.953              |                       |                       |
| 80.0       | 1029.329              | 1028.256              | 1027.144              | 1023.552              |                       |                       |
| 120.0      | 1044.099              | 1042.962              | 1041.785              | 1037.975              |                       |                       |
| 2-pentanol |                       |                       |                       |                       |                       |                       |
|            | $m=0.06386$           | $m=0.08559$           | $m=0.11549$           | $m=0.27075$           | $m=0.49376$           |                       |
|            | /mol $\text{kg}^{-1}$ |                       |
| 0.1*       | 996.165               | 995.872               | 995.470               | 993.519               | 990.993               |                       |
| 20.0       | 1004.897              | 1004.585              | 1004.158              | 1002.085              | 999.400               |                       |
| 40.0       | 1013.329              | 1013.000              | 1012.552              | 1010.374              | 1007.546              |                       |
| 60.0       | 1021.434              | 1021.091              | 1020.623              | 1018.354              | 1015.403              |                       |
| 80.0       | 1029.234              | 1028.877              | 1028.392              | 1026.043              | 1022.986              |                       |
| 120.0      | 1043.996              | 1043.615              | 1043.102              | 1040.615              | 1037.389              |                       |
| 2-hexanol  |                       |                       |                       |                       |                       |                       |
|            | $m=0.03075$           | $m=0.04110$           | $m=0.04868$           | $m=0.05999$           | $m=0.08201$           |                       |
|            | /mol $\text{kg}^{-1}$ |                       |
| 0.1*       | 996.574               | 996.414               | 996.297               | 996.125               | 995.787               |                       |
| 20.0       | 1005.331              | 1005.161              | 1005.037              | 1004.853              | 1004.493              |                       |
| 40.0       | 1013.787              | 1013.608              | 1013.478              | 1013.283              | 1012.907              |                       |
| 60.0       | 1021.913              | 1021.727              | 1021.592              | 1021.389              | 1020.998              |                       |
| 80.0       | 1029.730              | 1029.538              | 1029.399              | 1029.188              | 1028.784              |                       |
| 120.0      | 1044.521              | 1044.318              | 1044.172              | 1043.948              | 1043.521              |                       |

**Table S2 (cont.)**

| 1,4-butanediol  |                       |                       |                       |                       |
|-----------------|-----------------------|-----------------------|-----------------------|-----------------------|
| <i>p</i>        | <i>m</i> =0.25266     | <i>m</i> =0.26786     | <i>m</i> =0.29529     | <i>m</i> =0.48784     |
| /MPa            | /mol kg <sup>-1</sup> | /mol kg <sup>-1</sup> | /mol kg <sup>-1</sup> | /mol kg <sup>-1</sup> |
| 0.1*            | 997.595               | 997.629               | 997.696               | 998.148               |
| 20.0            | 1006.251              | 1006.278              | 1006.332              | 1006.689              |
| 40.0            | 1014.613              | 1014.635              | 1014.676              | 1014.949              |
| 60.0            | 1022.655              | 1022.672              | 1022.703              | 1022.900              |
| 80.0            | 1030.399              | 1030.409              | 1030.431              | 1030.560              |
| 120.0           | 1045.067              | 1045.064              | 1045.071              | 1045.083              |
| 1,5-pentanediol |                       |                       |                       |                       |
|                 | <i>m</i> =0.07314     | <i>m</i> =0.14913     | <i>m</i> =0.36620     | <i>m</i> =0.44095     |
|                 | /mol kg <sup>-1</sup> | /mol kg <sup>-1</sup> | /mol kg <sup>-1</sup> | /mol kg <sup>-1</sup> |
| 0.1*            | 997.066               | 997.087               | 997.211               | 997.277               |
| 20.0            | 1005.804              | 1005.774              | 1005.760              | 1005.781              |
| 40.0            | 1014.240              | 1014.163              | 1014.024              | 1014.003              |
| 60.0            | 1022.347              | 1022.228              | 1021.978              | 1021.918              |
| 80.0            | 1030.148              | 1029.992              | 1029.640              | 1029.546              |
| 120.0           | 1044.911              | 1044.694              | 1044.170              | 1044.016              |
| 1,6-hexanediol  |                       |                       |                       |                       |
|                 | <i>m</i> =0.06751     | <i>m</i> =0.09216     | <i>m</i> =0.29736     | <i>m</i> =0.41309     |
|                 | /mol kg <sup>-1</sup> | /mol kg <sup>-1</sup> | /mol kg <sup>-1</sup> | /mol kg <sup>-1</sup> |
| 0.1*            | 996.927               | 996.886               | 996.570               | 996.440               |
| 20.0            | 1005.658              | 1005.597              | 1005.121              | 1004.908              |
| 40.0            | 1014.086              | 1014.007              | 1013.387              | 1013.097              |
| 60.0            | 1022.187              | 1022.092              | 1021.342              | 1020.982              |
| 80.0            | 1029.982              | 1029.872              | 1029.005              | 1028.582              |
| 120.0           | 1044.734              | 1044.600              | 1043.531              | 1043.001              |

\* Densities at *p*=0.1 MPa were measured using an Anton Paar 60/602 vibrating tube densimeter

**Table S3.** Calculated apparent molar volumes,  $V_{\phi 2} /(\text{cm}^3 \text{mol}^{-1})$ , for selected aqueous alcohol and aqueous diol systems at fixed concentrations,  $p = (0.1, 20.0, 40.0, 60.0, 80.0, 120.0)$  MPa, and  $T = 298.15$  K

| 2-propanol |                       |                       |                       |                       |                       |                       |
|------------|-----------------------|-----------------------|-----------------------|-----------------------|-----------------------|-----------------------|
| $p$        | $m=0.04760$           | $m=0.07518$           | $m=0.14367$           | $m=0.20718$           | $m=0.29132$           | $m=0.51970$           |
| /MPa       | /mol kg <sup>-1</sup> |
| 0.1        | 71.87                 | 71.82                 | 71.70                 | 71.64                 | 71.50                 | 71.25                 |
| 20.0       | 71.73                 | 71.65                 | 71.54                 | 71.48                 | 71.37                 | 71.09                 |
| 40.0       | 71.53                 | 71.45                 | 71.33                 | 71.28                 | 71.20                 | 70.89                 |
| 60.0       | 71.29                 | 71.20                 | 71.08                 | 71.03                 | 70.99                 | 70.64                 |
| 80.0       | 71.01                 | 70.92                 | 70.80                 | 70.74                 | 70.75                 | 70.37                 |
| 120.0      | 70.34                 | 70.26                 | 70.13                 | 70.09                 | 70.13                 | 69.75                 |
| 2-butanol  |                       |                       |                       |                       |                       |                       |
|            | $m=0.06700$           | $m=0.14261$           | $m=0.22305$           | $m=0.50121$           |                       |                       |
|            | /mol kg <sup>-1</sup> | /mol kg <sup>-1</sup> | /mol kg <sup>-1</sup> | /mol kg <sup>-1</sup> |                       |                       |
| 0.1        | 86.59                 | 86.49                 | 86.40                 | 86.06                 |                       |                       |
| 20.0       | 86.47                 | 86.37                 | 86.28                 | 85.92                 |                       |                       |
| 40.0       | 86.27                 | 86.17                 | 86.08                 | 85.72                 |                       |                       |
| 60.0       | 86.02                 | 85.92                 | 85.83                 | 85.47                 |                       |                       |
| 80.0       | 85.72                 | 85.64                 | 85.54                 | 85.19                 |                       |                       |
| 120.0      | 85.04                 | 84.99                 | 84.91                 | 84.56                 |                       |                       |
| 2-pentanol |                       |                       |                       |                       |                       |                       |
|            | $m=0.06386$           | $m=0.08559$           | $m=0.11549$           | $m=0.27075$           | $m=0.49376$           |                       |
|            | /mol kg <sup>-1</sup> |                       |
| 0.1        | 102.41                | 102.35                | 102.32                | 101.88                | 101.36                |                       |
| 20.0       | 102.28                | 102.22                | 102.18                | 101.71                | 101.17                |                       |
| 40.0       | 102.05                | 102.00                | 101.95                | 101.46                | 100.91                |                       |
| 60.0       | 101.77                | 101.72                | 101.66                | 101.14                | 100.59                |                       |
| 80.0       | 101.44                | 101.39                | 101.33                | 100.80                | 100.23                |                       |
| 120.0      | 100.65                | 100.65                | 100.58                | 100.03                | 99.42                 |                       |
| 2-hexanol  |                       |                       |                       |                       |                       |                       |
|            | $m=0.03075$           | $m=0.04110$           | $m=0.04868$           | $m=0.05999$           | $m=0.08201$           |                       |
|            | /mol kg <sup>-1</sup> |                       |
| 0.1        | 118.04                | 118.07                | 118.09                | 118.06                | 118.09                |                       |
| 20.0       | 117.90                | 117.92                | 117.93                | 117.92                | 117.94                |                       |
| 40.0       | 117.59                | 117.61                | 117.61                | 117.62                | 117.62                |                       |
| 60.0       | 117.21                | 117.22                | 117.21                | 117.23                | 117.22                |                       |
| 80.0       | 116.78                | 116.79                | 116.77                | 116.80                | 116.79                |                       |
| 120.0      | 115.85                | 115.86                | 115.81                | 115.87                | 115.86                |                       |

**Table S3 (cont.)**

| 1,4-butanediol  |                       |                       |                       |                       |
|-----------------|-----------------------|-----------------------|-----------------------|-----------------------|
| <i>p</i>        | <i>m</i> =0.25266     | <i>m</i> =0.26786     | <i>m</i> =0.29529     | <i>m</i> =0.48784     |
| /MPa            | /mol kg <sup>-1</sup> | /mol kg <sup>-1</sup> | /mol kg <sup>-1</sup> | /mol kg <sup>-1</sup> |
| 0.1             | 88.16                 | 88.15                 | 88.12                 | 88.02                 |
| 20.0            | 87.94                 | 87.93                 | 87.90                 | 87.80                 |
| 40.0            | 87.69                 | 87.67                 | 87.64                 | 87.54                 |
| 60.0            | 87.41                 | 87.39                 | 87.35                 | 87.25                 |
| 80.0            | 87.11                 | 87.09                 | 87.05                 | 86.95                 |
| 120.0           | 86.45                 | 86.45                 | 86.40                 | 86.31                 |
| 1,5-pentanediol |                       |                       |                       |                       |
|                 | <i>m</i> =0.07314     | <i>m</i> =0.14913     | <i>m</i> =0.36620     | <i>m</i> =0.44095     |
|                 | /mol kg <sup>-1</sup> | /mol kg <sup>-1</sup> | /mol kg <sup>-1</sup> | /mol kg <sup>-1</sup> |
| 0.1             | 104.21                | 104.19                | 103.99                | 103.91                |
| 20.0            | 103.99                | 103.97                | 103.76                | 103.68                |
| 40.0            | 103.73                | 103.71                | 103.49                | 103.40                |
| 60.0            | 103.43                | 103.41                | 103.18                | 103.10                |
| 80.0            | 103.10                | 103.08                | 102.86                | 102.78                |
| 120.0           | 102.36                | 102.35                | 102.13                | 102.06                |
| 1,6-hexanediol  |                       |                       |                       |                       |
|                 | <i>m</i> =0.06751     | <i>m</i> =0.09216     | <i>m</i> =0.29736     | <i>m</i> =0.41309     |
|                 | /mol kg <sup>-1</sup> | /mol kg <sup>-1</sup> | /mol kg <sup>-1</sup> | /mol kg <sup>-1</sup> |
| 0.1             | 120.34                | 120.31                | 120.20                | 120.08                |
| 20.0            | 120.14                | 120.10                | 119.96                | 119.82                |
| 40.0            | 119.88                | 119.82                | 119.66                | 119.52                |
| 60.0            | 119.57                | 119.51                | 119.32                | 119.19                |
| 80.0            | 119.22                | 119.15                | 118.96                | 118.82                |
| 120.0           | 118.43                | 118.36                | 118.16                | 118.02                |

**Table S4.** Calculated isentropic compressibilities,  $10^5 \kappa_{S2}$  /MPa<sup>-1</sup>, for selected aqueous alcohol and aqueous diol systems at fixed concentrations,  $p = (0.1, 20.0, 40.0, 60.0, 80.0, 120.0)$  MPa, and  $T = 298.15$  K

| 2-propanol |                       |                       |                       |                       |                       |                       |
|------------|-----------------------|-----------------------|-----------------------|-----------------------|-----------------------|-----------------------|
| $p$        | $m=0.04760$           | $m=0.07518$           | $m=0.14367$           | $m=0.20718$           | $m=0.29132$           | $m=0.51970$           |
| /MPa       | /mol kg <sup>-1</sup> |
| 0.1        | 44.65                 | 44.58                 | 44.40                 | 44.24                 | 44.03                 | 43.48                 |
| 20.0       | 42.35                 | 42.29                 | 42.14                 | 42.00                 | 41.82                 | 41.35                 |
| 40.0       | 40.23                 | 40.18                 | 40.06                 | 39.94                 | 39.54                 | 39.39                 |
| 60.0       | 38.27                 | 38.22                 | 38.12                 | 38.03                 | 37.90                 | 37.56                 |
| 80.0       | 36.45                 | 36.41                 | 36.33                 | 36.26                 | 36.16                 | 35.87                 |
| 120.0      | 33.21                 | 33.19                 | 33.14                 | 33.09                 | 33.03                 | 32.82                 |
| 2-butanol  |                       |                       |                       |                       |                       |                       |
|            | $m=0.06700$           | $m=0.14261$           | $m=0.22305$           | $m=0.50121$           |                       |                       |
|            | /mol kg <sup>-1</sup> | /mol kg <sup>-1</sup> | /mol kg <sup>-1</sup> | /mol kg <sup>-1</sup> |                       |                       |
| 0.1        | 44.53                 | 44.26                 | 43.98                 | 43.04                 |                       |                       |
| 20.0       | 42.26                 | 42.04                 | 41.81                 | 41.02                 |                       |                       |
| 40.0       | 40.15                 | 39.96                 | 39.76                 | 39.09                 |                       |                       |
| 60.0       | 38.19                 | 38.03                 | 37.86                 | 37.27                 |                       |                       |
| 80.0       | 36.39                 | 36.25                 | 36.10                 | 35.59                 |                       |                       |
| 120.0      | 33.16                 | 33.06                 | 32.96                 | 32.57                 |                       |                       |
| 2-pentanol |                       |                       |                       |                       |                       |                       |
|            | $m=0.06386$           | $m=0.08559$           | $m=0.11549$           | $m=0.27075$           | $m=0.49376$           |                       |
|            | /mol kg <sup>-1</sup> |                       |
| 0.1        | 44.49                 | 44.40                 | 44.27                 | 43.63                 | 42.78                 |                       |
| 20.0       | 42.23                 | 42.15                 | 42.05                 | 41.53                 | 40.87                 |                       |
| 40.0       | 40.12                 | 40.05                 | 39.96                 | 39.52                 | 38.90                 |                       |
| 60.0       | 38.17                 | 38.11                 | 38.03                 | 37.65                 | 37.10                 |                       |
| 80.0       | 36.36                 | 36.31                 | 36.25                 | 35.93                 | 35.49                 |                       |
| 120.0      | 33.15                 | 33.10                 | 33.05                 | 32.82                 | 32.49                 |                       |
| 2-hexanol  |                       |                       |                       |                       |                       |                       |
|            | $m=0.03075$           | $m=0.04110$           | $m=0.04868$           | $m=0.05999$           | $m=0.08201$           |                       |
|            | /mol kg <sup>-1</sup> |                       |
| 0.1        | 44.61                 | 44.55                 | 44.51                 | 44.45                 | 44.33                 |                       |
| 20.0       | 42.33                 | 42.29                 | 42.26                 | 42.22                 | 42.13                 |                       |
| 40.0       | 40.21                 | 40.18                 | 40.15                 | 40.11                 | 40.04                 |                       |
| 60.0       | 38.25                 | 38.22                 | 38.20                 | 38.17                 | 38.11                 |                       |
| 80.0       | 36.43                 | 36.40                 | 36.39                 | 36.36                 | 36.31                 |                       |
| 120.0      | 33.19                 | 33.17                 | 33.16                 | 33.14                 | 33.10                 |                       |

**Table S4(cont.)**

| 1,4-butanediol  |                       |                       |                       |                       |
|-----------------|-----------------------|-----------------------|-----------------------|-----------------------|
| <i>p</i>        | <i>m</i> =0.25266     | <i>m</i> =0.26786     | <i>m</i> =0.29529     | <i>m</i> =0.48784     |
| /MPa            | /mol kg <sup>-1</sup> | /mol kg <sup>-1</sup> | /mol kg <sup>-1</sup> | /mol kg <sup>-1</sup> |
| 0.1             | 44.03                 | 43.98                 | 43.91                 | 43.37                 |
| 20.0            | 41.81                 | 41.78                 | 41.72                 | 41.25                 |
| 40.0            | 39.74                 | 39.71                 | 39.65                 | 39.24                 |
| 60.0            | 37.83                 | 37.80                 | 37.75                 | 37.38                 |
| 80.0            | 36.07                 | 36.04                 | 35.99                 | 35.68                 |
| 120.0           | 32.91                 | 32.89                 | 32.86                 | 32.60                 |
| 1,5-pentanediol |                       |                       |                       |                       |
|                 | <i>m</i> =0.07314     | <i>m</i> =0.14913     | <i>m</i> =0.36620     | <i>m</i> =0.44095     |
|                 | /mol kg <sup>-1</sup> | /mol kg <sup>-1</sup> | /mol kg <sup>-1</sup> | /mol kg <sup>-1</sup> |
| 0.1             | 44.50                 | 44.22                 | 43.45                 | 43.21                 |
| 20.0            | 42.22                 | 41.97                 | 41.30                 | 41.08                 |
| 40.0            | 40.10                 | 39.88                 | 39.29                 | 39.08                 |
| 60.0            | 38.14                 | 37.95                 | 37.43                 | 37.24                 |
| 80.0            | 36.34                 | 36.17                 | 35.71                 | 35.55                 |
| 120.0           | 33.12                 | 33.00                 | 32.65                 | 32.51                 |
| 1,6-hexanediol  |                       |                       |                       |                       |
|                 | <i>m</i> =0.06751     | <i>m</i> =0.09216     | <i>m</i> =0.29736     | <i>m</i> =0.41309     |
|                 | /mol kg <sup>-1</sup> | /mol kg <sup>-1</sup> | /mol kg <sup>-1</sup> | /mol kg <sup>-1</sup> |
| 0.1             | 44.46                 | 44.35                 | 43.47                 | 43.02                 |
| 20.0            | 42.19                 | 42.09                 | 41.33                 | 40.93                 |
| 40.0            | 40.07                 | 39.98                 | 39.30                 | 38.94                 |
| 60.0            | 38.12                 | 38.04                 | 37.44                 | 37.11                 |
| 80.0            | 36.32                 | 36.25                 | 35.72                 | 35.43                 |
| 120.0           | 33.10                 | 33.04                 | 32.63                 | 32.40                 |



**Table S5.** Calculated isothermal compressibilities,  $10^5 \kappa_{T2}$  /MPa<sup>-1</sup>, for selected aqueous alcohol and aqueous diol systems at fixed concentrations,  $p = (0.1, 20.0, 40.0, 60.0, 80.0, 120.0)$  MPa, and  $T = 298.15$  K

| 2-propanol |                       |                       |                       |                       |                       |                       |
|------------|-----------------------|-----------------------|-----------------------|-----------------------|-----------------------|-----------------------|
| $p$        | $m=0.04760$           | $m=0.07518$           | $m=0.14367$           | $m=0.20718$           | $m=0.29132$           | $m=0.51970$           |
| /MPa       | /mol kg <sup>-1</sup> |
| 0.1        | 45.12                 | 45.06                 | 44.88                 | 44.73                 | 44.52                 | 43.98                 |
| 20.0       | 42.90                 | 42.85                 | 42.70                 | 42.56                 | 42.39                 | 41.94                 |
| 40.0       | 40.87                 | 40.82                 | 40.70                 | 40.59                 | 40.19                 | 40.06                 |
| 60.0       | 38.99                 | 38.95                 | 38.85                 | 38.76                 | 38.64                 | 38.31                 |
| 80.0       | 37.25                 | 37.22                 | 37.14                 | 37.07                 | 36.97                 | 36.70                 |
| 120.0      | 34.15                 | 34.13                 | 34.08                 | 34.04                 | 33.98                 | 33.78                 |
| 2-butanol  |                       |                       |                       |                       |                       |                       |
|            | $m=0.06700$           | $m=0.14261$           | $m=0.22305$           | $m=0.50121$           |                       |                       |
|            | /mol kg <sup>-1</sup> | /mol kg <sup>-1</sup> | /mol kg <sup>-1</sup> | /mol kg <sup>-1</sup> |                       |                       |
| 0.1        | 45.01                 | 44.75                 | 44.48                 | 43.60                 |                       |                       |
| 20.0       | 42.82                 | 42.61                 | 42.39                 | 41.66                 |                       |                       |
| 40.0       | 40.79                 | 40.61                 | 40.42                 | 39.80                 |                       |                       |
| 60.0       | 38.93                 | 38.77                 | 38.61                 | 38.07                 |                       |                       |
| 80.0       | 37.20                 | 37.06                 | 36.92                 | 36.46                 |                       |                       |
| 120.0      | 34.10                 | 34.01                 | 33.91                 | 33.57                 |                       |                       |
| 2-pentanol |                       |                       |                       |                       |                       |                       |
|            | $m=0.06386$           | $m=0.08559$           | $m=0.11549$           | $m=0.27075$           | $m=0.49376$           |                       |
|            | /mol kg <sup>-1</sup> |                       |
| 0.1        | 44.98                 | 44.89                 | 44.77                 | 44.18                 | 43.41                 |                       |
| 20.0       | 42.79                 | 42.72                 | 42.62                 | 42.16                 | 41.58                 |                       |
| 40.0       | 40.77                 | 40.70                 | 40.62                 | 40.23                 | 39.68                 |                       |
| 60.0       | 38.90                 | 38.85                 | 38.78                 | 38.43                 | 37.95                 |                       |
| 80.0       | 37.18                 | 37.13                 | 37.07                 | 36.79                 | 36.42                 |                       |
| 120.0      | 34.10                 | 34.05                 | 34.01                 | 33.81                 | 33.54                 |                       |
| 2-hexanol  |                       |                       |                       |                       |                       |                       |
|            | $m=0.03075$           | $m=0.04110$           | $m=0.04868$           | $m=0.05999$           | $m=0.08201$           |                       |
|            | /mol kg <sup>-1</sup> |                       |
| 0.1        | 45.09                 | 45.04                 | 45.00                 | 44.94                 | 44.83                 |                       |
| 20.0       | 42.90                 | 42.86                 | 42.83                 | 42.79                 | 42.71                 |                       |
| 40.0       | 40.86                 | 40.83                 | 40.81                 | 40.77                 | 40.70                 |                       |
| 60.0       | 38.98                 | 38.96                 | 38.94                 | 38.91                 | 38.85                 |                       |
| 80.0       | 37.24                 | 37.22                 | 37.20                 | 37.18                 | 37.13                 |                       |
| 120.0      | 34.13                 | 34.12                 | 34.11                 | 34.09                 | 34.05                 |                       |

**Table S5(cont.)**

| 1,4-butanediol  |                       |                       |                       |                       |
|-----------------|-----------------------|-----------------------|-----------------------|-----------------------|
| <i>p</i>        | <i>m</i> =0.25266     | <i>m</i> =0.26786     | <i>m</i> =0.29529     | <i>m</i> =0.48784     |
| /MPa            | /mol kg <sup>-1</sup> | /mol kg <sup>-1</sup> | /mol kg <sup>-1</sup> | /mol kg <sup>-1</sup> |
| 0.1             | 44.51                 | 44.47                 | 44.39                 | 43.86                 |
| 20.0            | 42.38                 | 42.35                 | 42.28                 | 41.83                 |
| 40.0            | 40.39                 | 40.36                 | 40.30                 | 39.90                 |
| 60.0            | 38.56                 | 38.53                 | 38.48                 | 38.12                 |
| 80.0            | 36.88                 | 36.85                 | 36.81                 | 36.49                 |
| 120.0           | 33.86                 | 33.84                 | 33.80                 | 33.55                 |
| 1,5-pentanediol |                       |                       |                       |                       |
|                 | <i>m</i> =0.07314     | <i>m</i> =0.14913     | <i>m</i> =0.36620     | <i>m</i> =0.44095     |
|                 | /mol kg <sup>-1</sup> | /mol kg <sup>-1</sup> | /mol kg <sup>-1</sup> | /mol kg <sup>-1</sup> |
| 0.1             | 44.98                 | 44.70                 | 43.96                 | 43.72                 |
| 20.0            | 42.78                 | 42.54                 | 41.88                 | 41.67                 |
| 40.0            | 40.75                 | 40.53                 | 39.96                 | 39.76                 |
| 60.0            | 38.88                 | 38.69                 | 38.17                 | 38.00                 |
| 80.0            | 37.15                 | 36.99                 | 36.53                 | 36.38                 |
| 120.0           | 34.06                 | 33.94                 | 33.60                 | 33.47                 |
| 1,6-hexanediol  |                       |                       |                       |                       |
|                 | <i>m</i> =0.06751     | <i>m</i> =0.09216     | <i>m</i> =0.29736     | <i>m</i> =0.41309     |
|                 | /mol kg <sup>-1</sup> | /mol kg <sup>-1</sup> | /mol kg <sup>-1</sup> | /mol kg <sup>-1</sup> |
| 0.1             | 44.94                 | 44.84                 | 43.99                 | 43.56                 |
| 20.0            | 42.75                 | 42.65                 | 41.93                 | 41.55                 |
| 40.0            | 40.72                 | 40.64                 | 39.98                 | 39.63                 |
| 60.0            | 38.85                 | 38.78                 | 38.20                 | 37.88                 |
| 80.0            | 37.13                 | 37.07                 | 36.56                 | 36.28                 |
| 120.0           | 34.04                 | 33.99                 | 33.60                 | 33.38                 |
